# Supplementary material
Source: Springer Nature journal article supplement (https://www.springermedizin.de/resource/supplementary/12905_2011_283_MOESM1_ESM.pdf/9518362)

Age at menarche

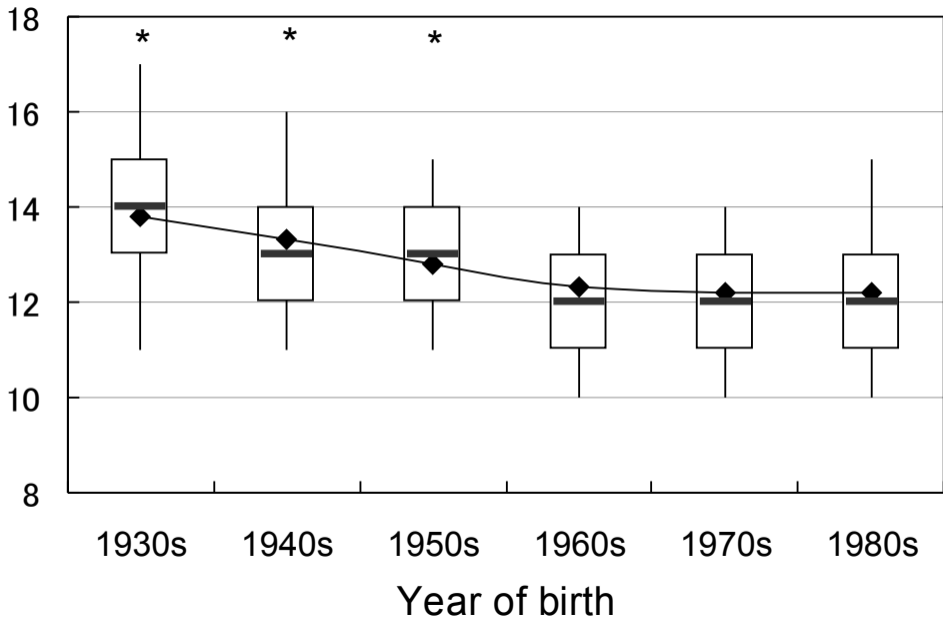

Mean

Supplement: MOESM1 [file 9518362]
